# Supplementary material for: Thermal-Induced Percolation Phenomena and Elasticity of Highly Oriented Electrospun Conductive Nanofibrous Biocomposites for Tissue Engineering
Source: MDPI journal article supplement (doi:10.3390/ijms23158451), 2022-07-30
Supplement: s1 [file s1]

## Supporting Information

### **Thermal-induced Percolation Phenomena and Elasticity of Highly Oriented Electrospun Conductive Nanofibrous Biocomposites for Tissue Engineering**

*Muhammad A. Munawar*<sup>1,2\*</sup> and *Dirk W. Schubert*<sup>1,2\*</sup>

<sup>1</sup> Institute of Polymer Materials, Department of Material Science, Faculty of Engineering, Friedrich-Alexander-University Erlangen-Nuremberg, Martensstrasse 7, 91058 Erlangen, Germany

<sup>2</sup> KeyLab Advanced Fiber Technology, Bavarian Polymer Institute, Dr.-Mack-Strasse 77, 90762 Fürth, Germany

\* Correspondence: muhammad.munawar@fau.de (M.A.M.); dirk.schubert@fau.de (D.W.S.)

## S1. Materials

PLA (Ingeo 4032D) containing 2% D-lactic acid and 98% L-lactic acid (Nature Works, USA) and polyaniline (PANi) (Merck, Germany) were used as polymer matrix and filler, respectively for fabrication of highly oriented electrospun conductive nanofibrous biocomposites (CNBs). The electrical conductivity of pure polymer matrix ( $\sigma_m$ ) was measured using the electrospun fibers of pure PLA on glass slide (value is shown in **Table S1** and a bit higher value is due to glass slide substrate and also some moisture effect). Polyaniline emeraldine base (PANi-EB) was doped with (+)-Camphor-10-sulfonic acid (CSA) in equal weight ratio (PANi:CSA = 1:1) and the electrical conductivity of doped-PANi ( $\sigma_f$ ) is stated in **Table S1**. The solvents ethanol (Et-OH) denatured  $\geq 99.8$ , N,N-dimethyl formamide (DMF)  $\geq 99.8$  and chloroform (CF) were purchased from Merck (Sigma-Aldrich) Germany. The characteristic properties of the materials used such as; molar mass ( $M_w$ ), conductivity ( $\sigma$ ) and values of melting point ( $mp$ ), boiling point ( $bp$ ), density ( $\rho$ ) are shown in **Table S1**.

**Table S1.** Characteristics and properties of materials used.

| Materials        | Molar mass<br>$M_w$ | Melting Point<br>$mp$ | Density $\rho$<br>at 25°C | Conductivity<br>$\sigma$                                                                                           |
|------------------|---------------------|-----------------------|---------------------------|--------------------------------------------------------------------------------------------------------------------|
|                  | (kDa)               | (°C)                  | (g cm <sup>-3</sup> )     | (S cm <sup>-1</sup> )                                                                                              |
| PLA              | 109                 | 166                   | 1.24                      | $\approx 1.39 \pm 0.9 \times 10^{-7}$ (PLA fibers on GS)                                                           |
| PANi-EB          | 65                  | > 350                 | 1.101                     | $\approx (1.1) \times 10^{-9}$ (pressed pellet, ASTM F8).<br>PANi:CSA (1:1) in weight ratio; $\approx (100 \pm 5)$ |
| CSA              | 232.30 Da           | 200                   | 1.302                     | -                                                                                                                  |
| H <sub>2</sub> O | 18.02 Da            | -                     | 1.000 at<br>3.98 °C       | $\leq (0.05) \times 10^{-6}$                                                                                       |
| CF               | 119.38 Da           | -                     | 1.48                      | $\leq (0.02) \times 10^{-6}$                                                                                       |
| Et-OH            | 46.07 Da            | -                     | 0.816                     | Non-conductive                                                                                                     |
| DMF              | 73.09 Da            | -                     | 0.944                     | $\leq (0.3) \times 10^{-6}$                                                                                        |

## S2. Preparation of spinning solution

The schematic procedure for preparation of spinning solutions is shown in **Figure S1a**. The matrix-solution and filler-solution/dispersion with their respective solvent systems were prepared separately, via step 1 and step 2, respectively. The independently prepared matrix-solution and filler-solution were mixed in different volume ratios (step 3). The procedure for

the derivation of equations for calculating the volume fraction of filler ( $\phi$ ) and density ( $\rho_c$ ) of electrospun conductive nanofibrous biocomposites (CNBs) are explained in Section S10.

### **S3. Electrospinning set-up for oriented fibers**

The electrospinning set-up (schematic shown in **Figure S1b-d**) consists of three main parts: a syringe with feeding pump delivering the spinning solution, a high voltage (HV) power supply (0-60 kV) and a rotating collector for the fibers, which was purpose-built at the University of Erlangen-Nuremberg. The fibers collected on the rotating wheel are straight and highly aligned in the machine direction MD, as shown in the photo (**Figure S1e**) of the wheel with fibers on it. The rotating collector consists of two circular terminal plates equipped with circular notches. The notches enable mounting of equally spaced horizontal bars. The bars are held in place by screws. In this study, sixteen bars were used. The spacing between two adjacent bars is 25 mm (2.5 cm). The rotating collector has a diameter of 21.2 cm. It can be used up to a speed of 1000 rpm, which corresponds to a tangential velocity of approximately 11 m/s. The matrix-filler solutions were poured into a 10 ml glass syringe with a blunt 20-gauge stainless steel nozzle with an inner diameter of approximately 0.61 mm and a flat tip. The conductivity and kinematic viscosity of spinning solutions were determined and stated in in Section S6 and Section S7, respectively. The high voltage power supply (60 kV, DC Linari Engineering S.r.l., and Valpiana, Italy) was used to produce a direct current with the positive polarity on the metallic nozzle while the collector was grounded. A feeding pump (Linari Engineering S.r.l., and Valpiana, Italy) was used to provide a constant flow-rate of the spinning solution. The processing parameters were varied and their ranges were; voltage (15-25kV), flow-rate (0.5-1.5 mL/h), tip-collector distance (9-15 cm) and collector rotation (100-400 rpm). At the optimized processing parameters, the spinning solution was ejected from the spinneret and stretched in the form of a charged jet towards the grounded collector. The optimization of processing parameters has been stated in detail in Section S5.

During the jet flight, stretching occurs due to electrical forces, while viscous forces counteract them as discussed in <sup>1</sup> theoretically and revealed experimentally <sup>2</sup>. The displacement of jets from spinneret to collector and the evaporation (almost complete) of solvent led to solid CNBs on the rotating wheel electrode. A detailed electrospinning theory can be found in the works by Schubert <sup>1,2</sup>.

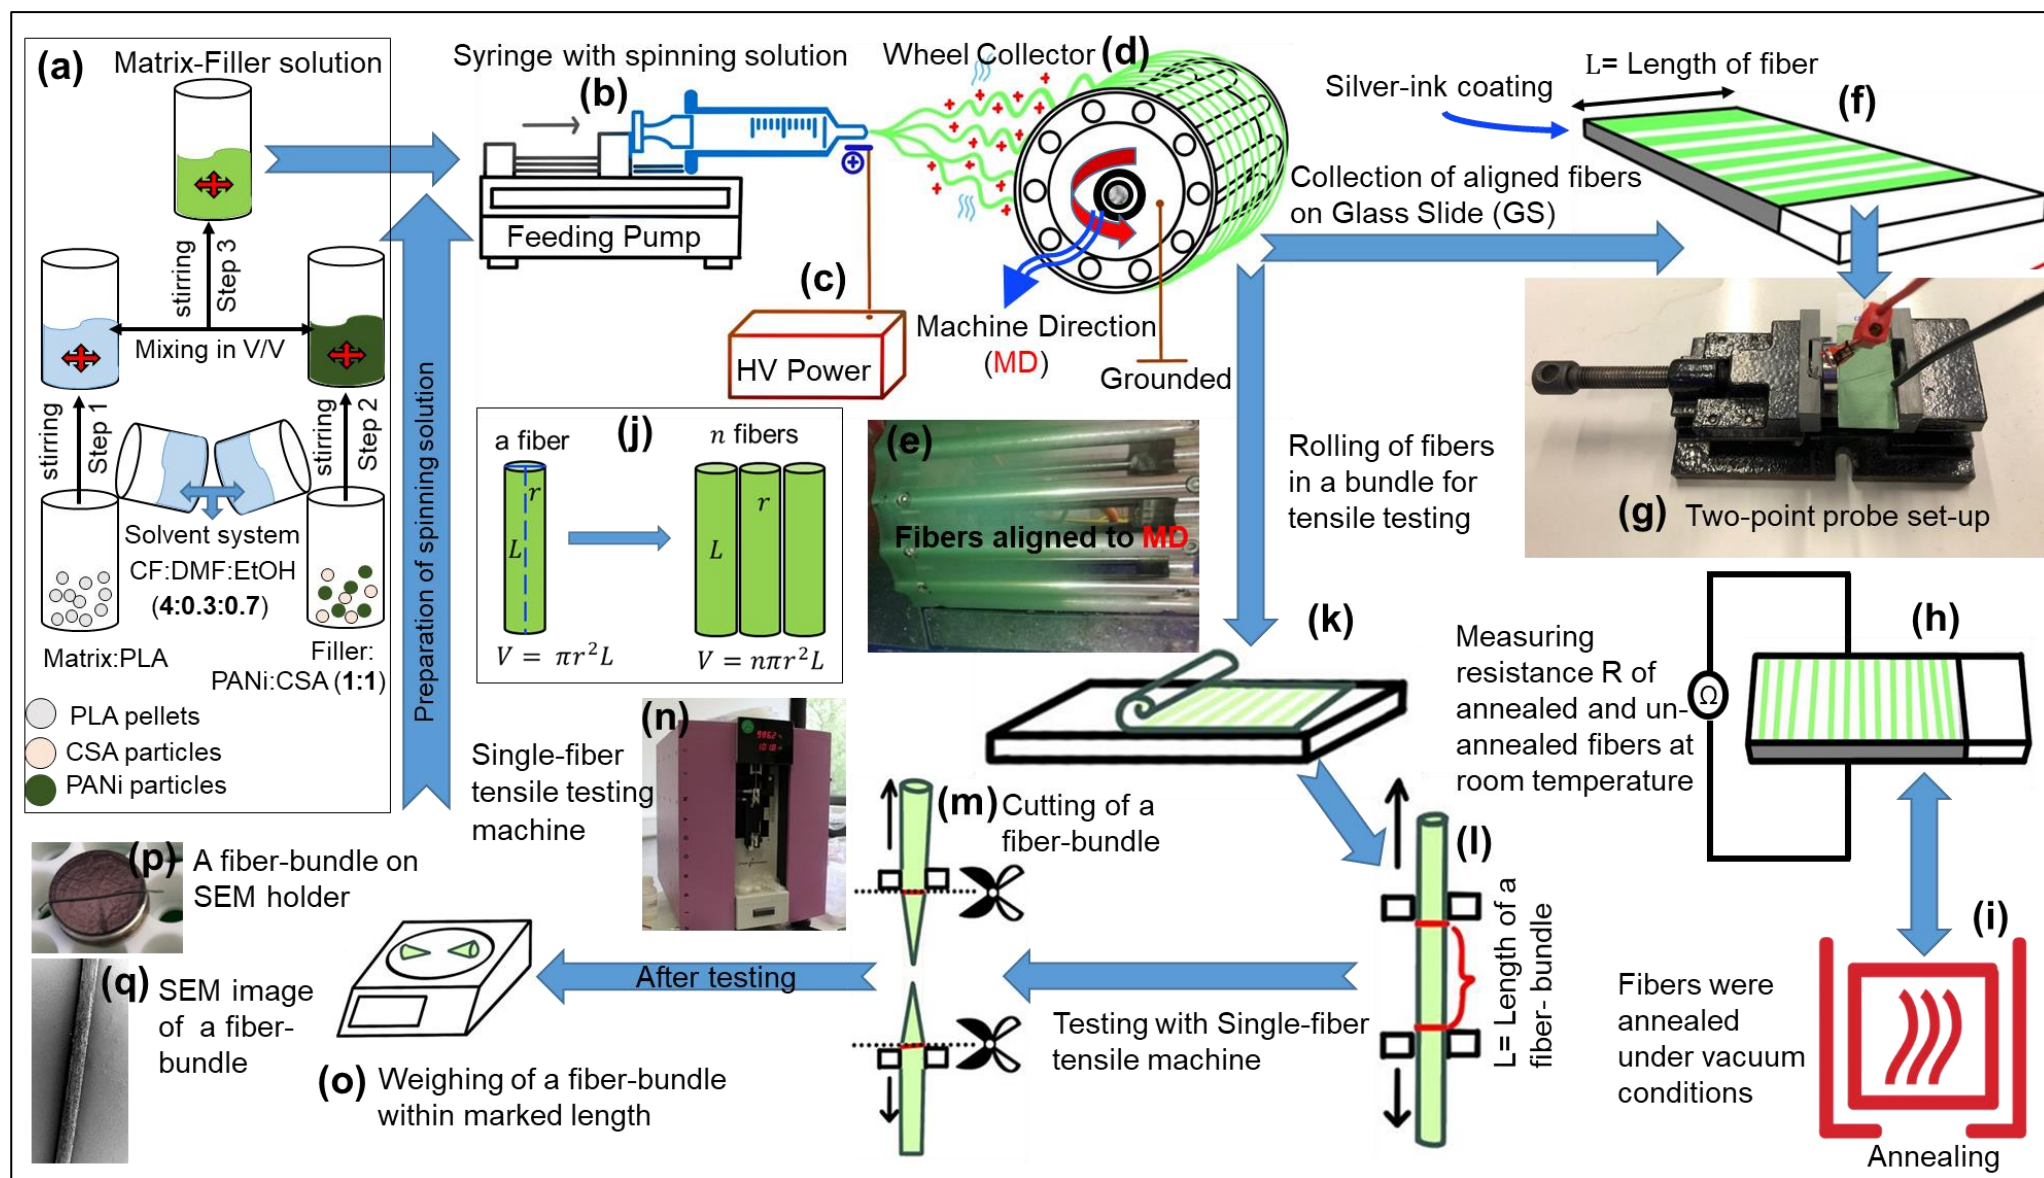

**Figure S1.** Schematic of preparation of spinning solution, electrospinning set-up and procedure for measurements of conductivity and elasticity of CNBs. Panel a shows the steps for preparation of matrix-filler solution. Panels b, c and d show the feeding pump, high voltage (HV) power supply and rotating wheel collector, respectively. The wheel covered with electrospun fibers aligned to machine direction (MD) is also shown in photo (panel e). Panels f, g, h and i show the glass slide (GS) with aligned fibers of length  $L$ , two-point probe set-up, Ohmmeter for resistance  $R$  measurement and annealing process, respectively. Panel j shows the schematic of a single fiber of length  $L$  and radius  $r$  and  $n$  fibers. Panels k, l and m show the rolling of fibers into a bundle, clamping of a fiber-bundle (within red marks of length  $L$ ) and testing of a fiber-bundle, respectively using a single-fiber tensile testing machine (Panel n). Panel o shows weighing of the tested sample within the marked length. Panels p and q show a fiber-bundle on SEM holder and SEM image of a fiber-bundle, respectively.

#### **S4. 3D-model of rotating wheel collector electrode**

A 3D model and its geometrical diagram are shown in **Figure S2** and **S3**, respectively

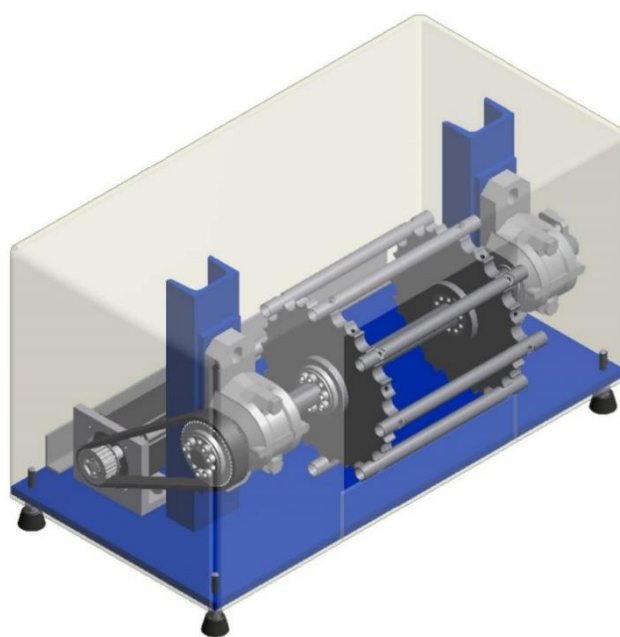

**Figure S2.** Custom made 3D-model of rotating wheel collector electrode, driven by a v-belt.

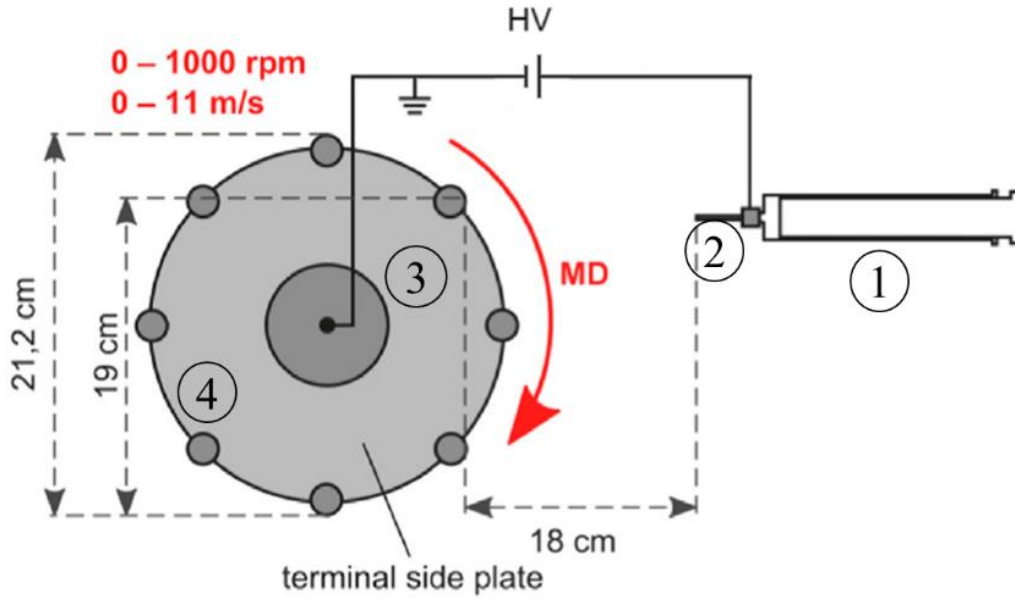

**Figure S3.** Geometrical diagram of rotating wheel collector electrode where;

1. Syringe with solution
2. Needle (Anode)
3. Rotating collector (Cathode)
4. Metallic circular bars for collecting fibers

### S5. Optimization of electrospinning processing parameters

The processing parameters were optimized regarding based on fiber diameter for PLA (matrix) and then quantified for PLA/PANi spinning solutions with subsequent increasing of PANi (filler) concentration. Among one of our case studies, electrospinning process was used to produce highly oriented electrospun fibers of PLA utilizing a special rotating collector electrode. Corresponding fiber diameter was analysed, varying the process parameters according to our empirical scaling laws (**Equation S1**) for polymer solution concentration ( $c$ ), viscosity ( $\eta$ ), flow-rate ( $Q$ ), spinning-distance ( $X$ ), voltage ( $U$ ), electric current ( $I$ ) and rotation-speed of the collector ( $\omega$ ).

$$d_f = k \cdot \left( \frac{\sqrt{c} \cdot \eta^{\frac{1}{3}} \cdot Q^{\frac{1}{5}} \cdot X^{\frac{2}{5}}}{U^{\frac{2}{3}} \cdot \omega^{\frac{1}{4}} \cdot I^{\frac{1}{5}}} \right) \quad (\text{S1})$$

Where  $k = 1674$  nm for this specified system (PLA solution) taking solution conductivity ( $\sigma$ ) and surface tension ( $\gamma$ ) as constant. For increasing the PANi concentration, the fiber diameter varies according  $D \sim \sigma^{-2/3}$ . Moreover, the qualitative and quantitative validation of **Equation**

**S1** is shown in **Figure S4** using the optimized processing parameters as stated in **Table S2**.

This part of work is in under publication process in our study with the title: ‘Modeling and optimization of diameter of highly oriented electrospun nanofibers of biopolymer’<sup>3</sup>.

However, in the latest studies, Schubert has demonstrated theoretically and experimentally, the novel scaling laws for various processing parameters in detail.

**Table S2.** Range of optimized processing parameters.

| Concentration | Viscosity            | Flow rate | Voltage | Distance | Rotation |
|---------------|----------------------|-----------|---------|----------|----------|
| c             | $\eta$               | Q         | U       | X        | $\omega$ |
| (%)           | (mm <sup>2</sup> /s) | (mL/h)    | (kV)    | (cm)     | (rpm)    |
| 9             | 193                  | 0.5       | 25      | 9        | 400      |
| 9             | 193                  | 1         | 25      | 12       | 400      |
| 9             | 193                  | 1.5       | 25      | 15       | 400      |
| 9             | 193                  | 0.5       | 20      | 9        | 200      |
| 9             | 193                  | 1         | 20      | 12       | 200      |
| 9             | 193                  | 1.5       | 20      | 15       | 200      |
| 9             | 193                  | 0.5       | 15      | 9        | 100      |
| 9             | 193                  | 1         | 15      | 12       | 100      |
| 9             | 193                  | 1.5       | 15      | 15       | 100      |
| 10            | 292                  | 0.5       | 25      | 9        | 400      |
| 10            | 292                  | 1         | 25      | 12       | 400      |
| 10            | 292                  | 1.5       | 25      | 15       | 400      |
| 10            | 292                  | 0.5       | 20      | 9        | 200      |
| 10            | 292                  | 1         | 20      | 12       | 200      |
| 10            | 292                  | 1.5       | 20      | 15       | 200      |
| 10            | 292                  | 0.5       | 15      | 9        | 100      |
| 10            | 292                  | 1         | 15      | 12       | 100      |
| 10            | 292                  | 1.5       | 15      | 15       | 100      |
| 11            | 414                  | 0.5       | 25      | 9        | 400      |
| 11            | 414                  | 1         | 25      | 12       | 400      |
| 11            | 414                  | 1.5       | 25      | 15       | 400      |
| 11            | 414                  | 0.5       | 20      | 9        | 200      |
| 11            | 414                  | 1         | 20      | 12       | 200      |
| 11            | 414                  | 1.5       | 20      | 15       | 200      |
| 11            | 414                  | 0.5       | 15      | 9        | 100      |
| 11            | 414                  | 1         | 15      | 12       | 100      |
| 11            | 414                  | 1.5       | 15      | 15       | 100      |



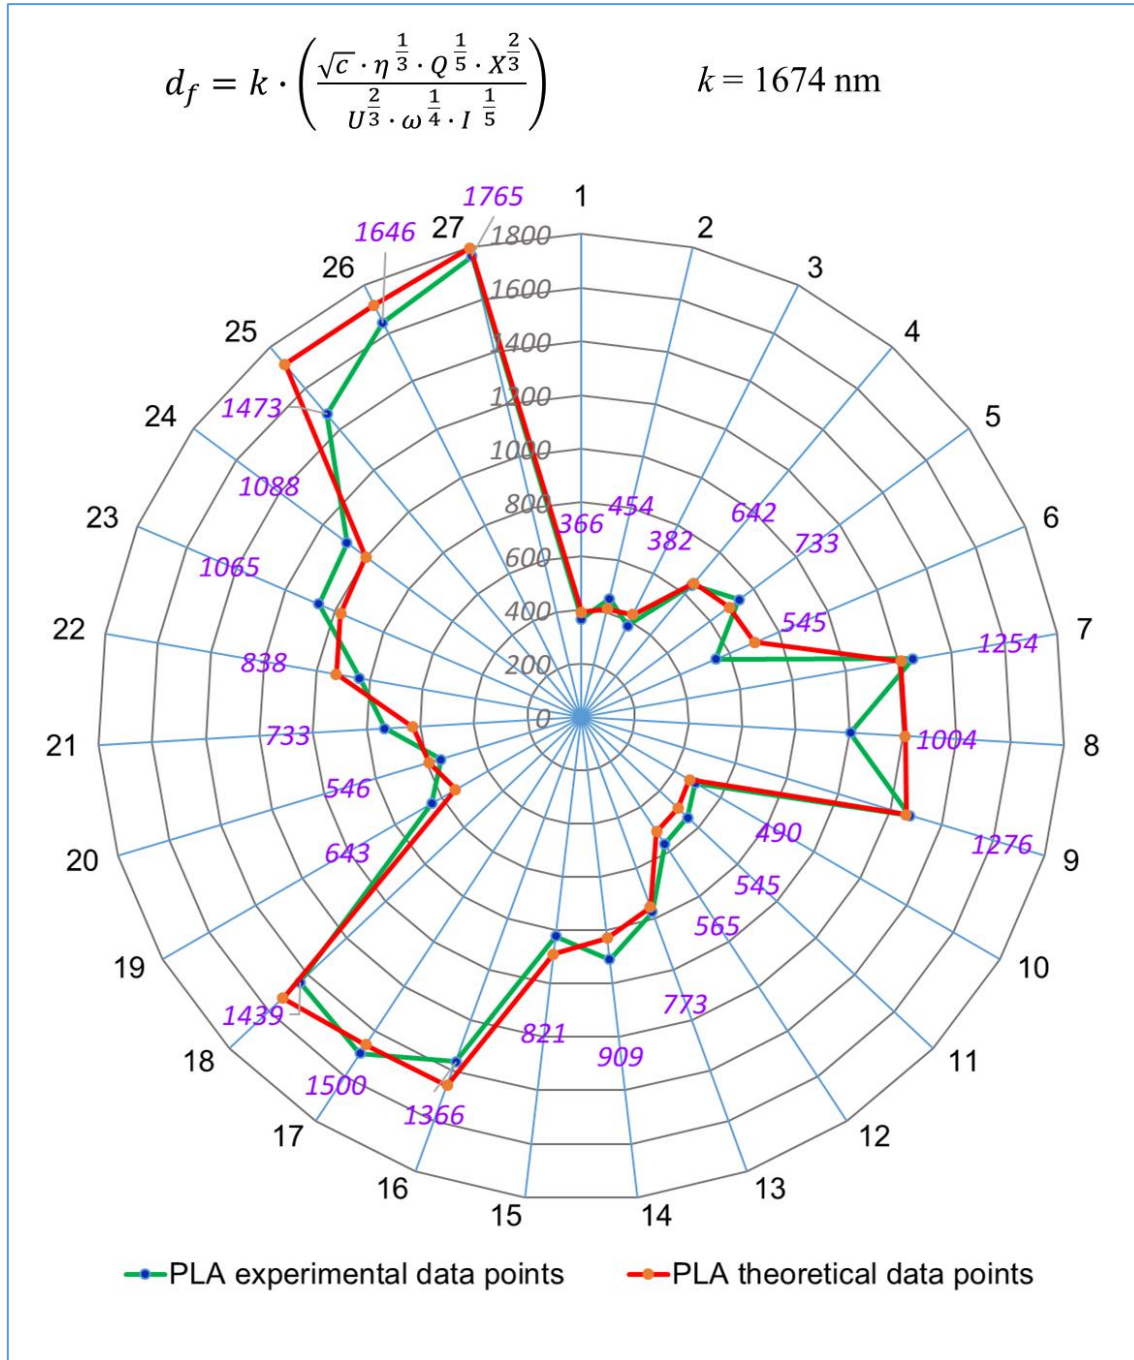

**Figure S4.** Theoretical and experimental diameter of electrospun fibers of PLA using empirical scaling laws (Eq.4) of various processing parameters.

#### S6. Determining the conductivity of spinning solutions using conductivity meter

PLA-PANi:CSA spinning solutions were prepared using mixture of chloroform (CF), dimethyl formamide (DMF) and ethanol (EtOH) with 4:0.3:0.7 ratio, respectively. To homogenize the solutions, they were kept on stirring for 12 h. Storage time of solutions was always less than 24 h. An electrical conductivity meter (SevenCompact Cond meter S230,

Mettler Toledo) was used to measure the conductivity of PLA-PANi:CSA spinning solutions at lab temperature (22°C). The conductivities of spinning solutions are stated in **Table S3**.

**Table S3.** Conductivity of spinning solutions varying composition of filler PANi and matrix polymer PLA in their solvents.

| Filler Concentration (%) | Matrix concentration (%) | Solution conductivity (μS/cm) |
|--------------------------|--------------------------|-------------------------------|
| 0                        | 100                      | 0.013                         |
| 1.8                      | 98.2                     | 2.84                          |
| 3.5                      | 96.5                     | 3.48                          |
| 5.4                      | 94.6                     | 4.67                          |
| 9.8                      | 90.2                     | 5.45                          |
| 16.6                     | 83.4                     | 6.6                           |
| 21.1                     | 78.9                     | 7.14                          |
| 27.5                     | 72.5                     | 7.3                           |
| 36.4                     | 63.6                     | 7.7                           |

#### **S7. Determining the kinematic viscosity of spinning solutions using Ubbelohde viscometer**

For the measurement of the kinematic viscosity, approximately 30 ml of each solution was filled in the Ubbelohde viscometer (Type capillary II<sub>c</sub>, Internal diameter = 1.50 mm, SI Analytics, Weilheim, Germany) and stored in a water bath at 22 °C. Before starting the measurements, the viscometer containing the solutions was kept in the water bath for at least 5 minutes to reach the required temperature. Viscosity was measured using the corrected flow time multiplied by the viscometer constant gives the kinematic viscosity directly using **Equation S2** <sup>4</sup>.

$$\eta = k(t - y) \quad (S2)$$

where,  $\eta$  is kinematic viscosity,  $k$  is the viscometer constant,  $t$  is average flow time through capillary and  $y$  is kinetic energy correction. The kinematic viscosity of spinning solutions are stated in **Table S4**.

**Table S4.** Kinematic viscosity of of spinning solutions varying composition of filler PANi and matrix polymer PLA in their solvents.

| <b>Filler Concentration</b> | <b>Matrix concentration</b> | <b>Kinematic viscosity</b> |
|-----------------------------|-----------------------------|----------------------------|
| (%)                         | (%)                         | (mm <sup>2</sup> /s)       |
| 0                           | 100                         | 297                        |
| 1.8                         | 98.2                        | 282.32                     |
| 3.5                         | 96.5                        | 266                        |
| 5.4                         | 94.6                        | 254.68                     |
| 9.8                         | 90.2                        | 224.43                     |
| 16.6                        | 83.4                        | 185.18                     |
| 21.1                        | 78.9                        | 157.2                      |
| 27.5                        | 72.5                        | 126.6                      |
| 36.4                        | 63.6                        | 76.59                      |

## S8. SEM statistical analysis

Examination of the electrospun fibers was performed by scanning electron microscopy (SEM) (AURIGA CrossBeam; Carl Zeiss Microscopy GmbH, Oberkochen, Germany) using an accelerating voltage of 5 kV. Prior to microscopy, the samples were coated with a 7.5 nm gold layer using a sputter coater (Q150T Turbo-pumped Sputter Coater, Quorum Technologies Inc., Guelph, ON, CA). The SEM images were further processed with Jmicro-Vision1.2.7 software to determine fiber diameter and orientation angle statistically, considering at least 100 measurements per investigated sample. The SEM images of PLA-PANi:CSA fibers were analyzed with JMicroVision software. JMicroVision can read/analyze images in many formats such GIF, TIF, DICOM, PEG, BMP, JPEG and FITS. In the present study TIF images were used. JMicroVision can calculate area and pixel value statistics of user defined selections. Firstly, pixel values of the images were converted into nanometer unit using the scale factor. Before using this command, the straight line selection tool was used to make a line selection that corresponded to known distance.

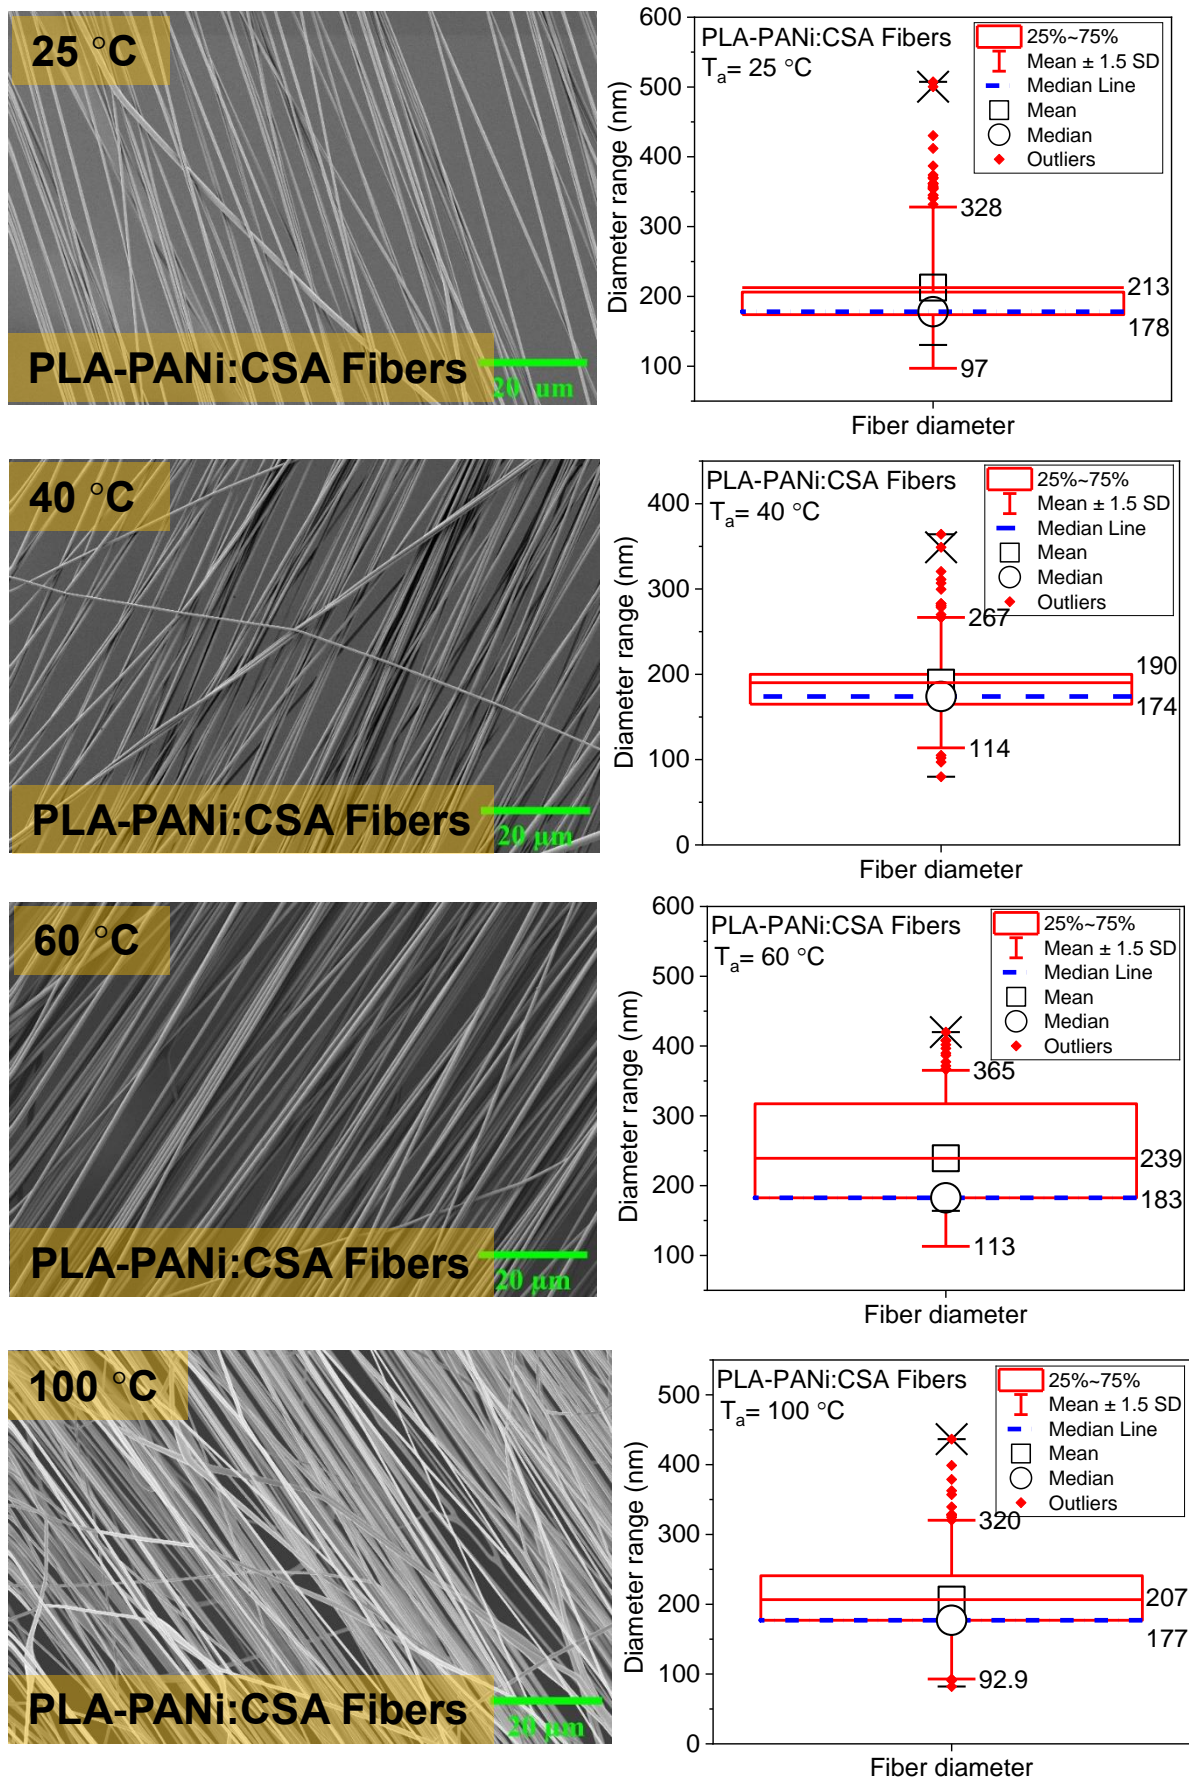

**Figure S5.** SEM images and corresponding box-plots for annealing temperature ( $T_a$ ) 25, 40, 60 and 100°C, respectively.



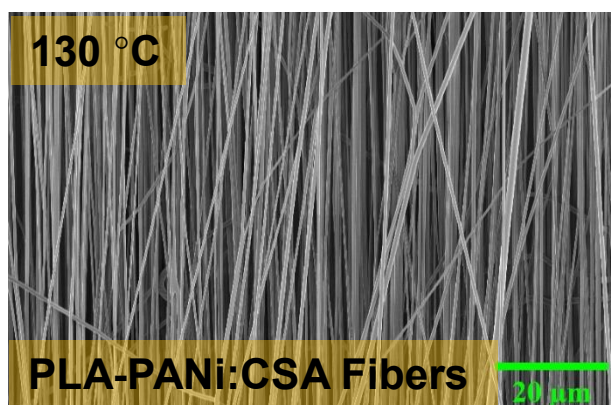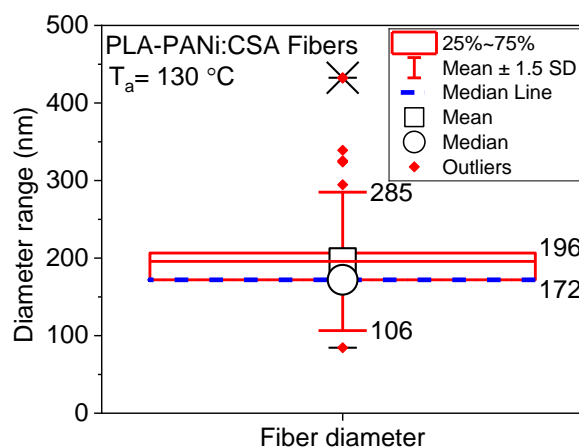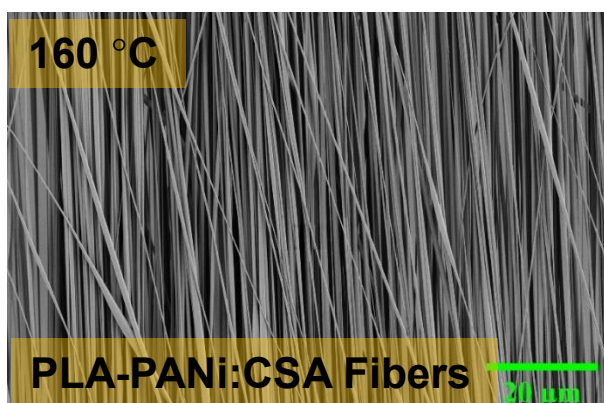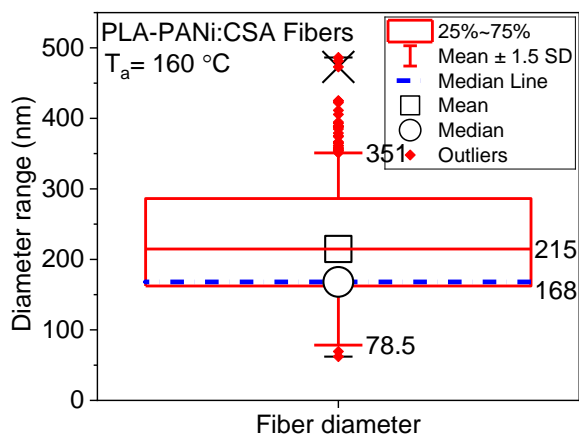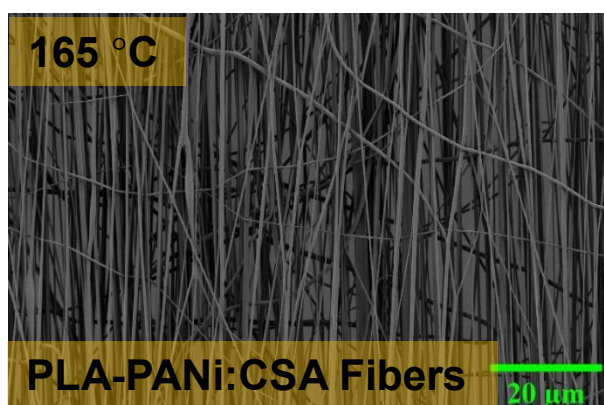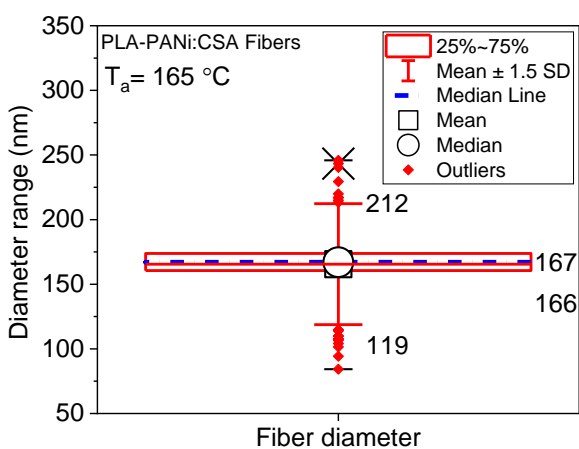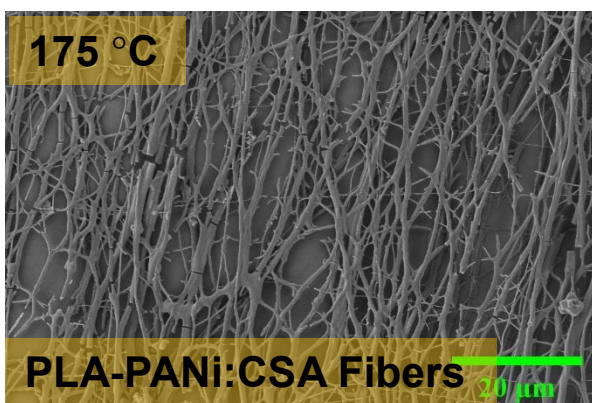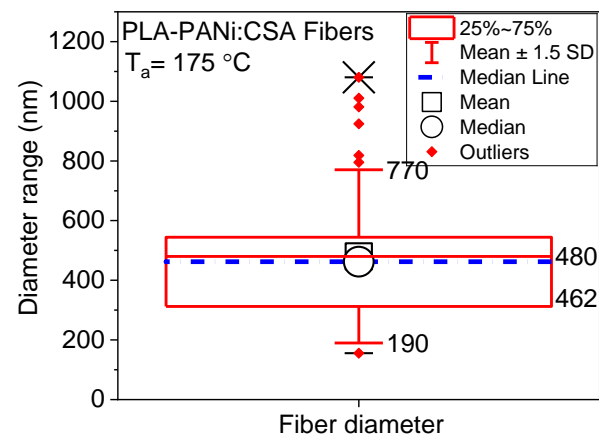

**Figure S6.** SEM images and corresponding box-plots for annealing temperature ( $T_a$ ) 130, 160, 165 and 175°C, respectively.

The SEM images and corresponding box-plot analysis for median and mean fiber diameter at each annealing temperature ( $T_a$ ) of 25, 40, 60, 100, 130, 160, 165 and 175°C are shown in **Figure S5** and **S6**, respectively. Box plots displaying the diameter size distribution of aligned fibers. The box outline is the interquartile range, the square and circle inside the box are the mean and median data points, the lines inside the box are the mean and median data locations, the whiskers display the upper inner and lower inner fence values. Above and below the whiskers: (–) maximum / minimum data point and (×) 99th percentile.

### S9. TEM analysis

For the TEM sample preparation, scaffolds containing aligned fibers were fixed in Ito's fixative (Carl Roth, Karlsruhe, Germany). Semi-thin sagittal sections were created with a microtome (Ultracut E; Reichert Jung, Vienna, Austria). Transmission electron microscopy (TEM) imaging was performed using a JEM-1400 Plus (JEOL GmbH, Freising, Germany).

### S10. Development of procedure and derivation of equations for calculating volume fraction of filler ( $\phi$ ) and density ( $\rho_c$ ) of solid electrospun conductive nanofibrous biocomposites (CNBs)

The procedure for calculating volume fraction of filler ( $\phi$ ) and density ( $\rho_c$ ) of CNBs is developed in this study. The densities of individual polymer matrix, filler and solvents are stated in **Table S1**. As the spinning solution containing the mixture of filler, matrix and solvent with different proportion of their respective components, the densities of filler-mixture ( $\rho_f$ ), solvent-mixture ( $\rho_s$ ), matrix-mixture ( $\rho_m$ ), filler-solution ( $\rho_{fs}$ ) and matrix-solution ( $\rho_{ms}$ ) are calculated step by step by a rule of mixture <sup>5</sup>;

$$\rho_f = \frac{1}{\frac{MF_{f1}}{\rho_{f1}} + \frac{MF_{f2}}{\rho_{f2}}} \quad (S3)$$

$$\rho_s = \frac{1}{\frac{MF_{s1}}{\rho_{s1}} + \frac{MF_{s2}}{\rho_{s2}}} \quad (S4)$$

$$\rho_m = \frac{1}{\frac{MF_{m1}}{\rho_{m1}} + \frac{MF_{m2}}{\rho_{m2}}} \quad (S5)$$

where;  $MF$  is mass fraction and the subscripts  $f_1$  and  $f_2$ ,  $S_1$  and  $S_2$  and  $m_1$  and  $m_2$  show the two components of filler-mixture, solvent-mixture and matrix-mixture, respectively.

As filler-solution and matrix-solution with their respective solvent systems were prepared in weight/weight percentage (w/w %) concentrations with **Equation S6** and **S7**, respectively

$$\frac{W}{W} \% = \frac{M_f}{M_{fs}} \cdot 100 = W_{fs} \quad (S6)$$

$$\frac{W}{W} \% = \frac{M_m}{M_{ms}} \cdot 100 = W_{ms} \quad (S7)$$

where;  $M_f$  and  $M_m$  are masses of filler and matrix in their respective masses of filler-solution ( $M_{fs}$ ) and matrix-solution ( $M_{ms}$ ), respectively. For simplicity,  $W_{fs}$  and  $W_{ms}$  are considered equivalent terms to overall masses of filler-solution and matrix-solution, respectively.

The densities of filler-solution ( $\rho_{fs}$ ) and matrix-solution ( $\rho_{ms}$ ) are determined using **Equation S8** and **S9**, respectively.

$$\rho_{fs} = \frac{1}{\frac{MF_f}{\rho_m} + \frac{MF_s}{\rho_s}} \quad (S8)$$

$$\rho_{ms} = \frac{1}{\frac{MF_m}{\rho_m} + \frac{MF_s}{\rho_s}} \quad (S9)$$

where;  $MF_m$ ,  $MF_f$  and  $MF_s$  are mass fractions of matrix, filler and solvent, respectively.

To convert w/w % concentrations to v/v % (volume/volume percentage) concentrations,

**Equation S6** and **S7** were divided by the densities of their respective species by using **Equation S8** and **S9**, respectively.

$$\frac{V}{V} \% = \frac{M_f}{M_{fs}} \cdot \frac{\rho_{fs}}{\rho_f} \cdot 100 = V_{fs} \quad (S10)$$

$$\frac{V}{V} \% = \frac{M_m}{M_{ms}} \cdot \frac{\rho_{ms}}{\rho_m} \cdot 100 = V_{ms} \quad (S11)$$

where;  $V_{ms}$  and  $V_{fs}$  are the volumes of matrix-solution and filler-solution, respectively.

To prepare matrix-filler solution for electrospinning, *volume x* of filler-solution ( $xV_{fs}$ ) and *volume y* of matrix-solution ( $yV_{ms}$ ) were mixed as shown in schematic **Figure S7**.

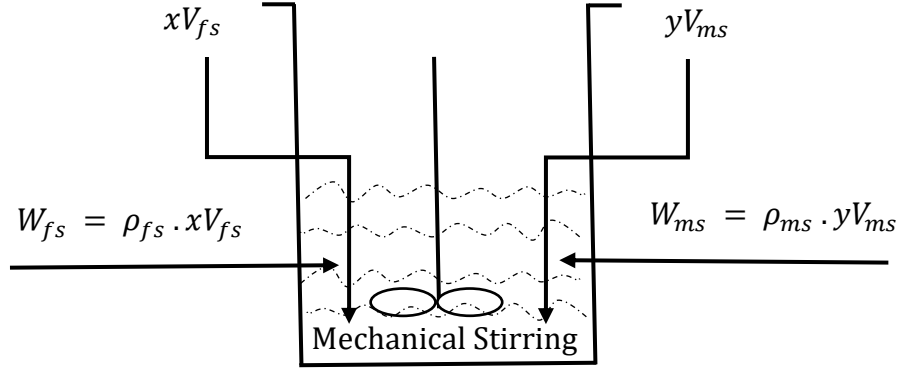

**Figure S7.** Schematic of mixing of *volume x* of filler-solution ( $xV_{fs}$ ) and *volume y* of matrix-solution ( $yV_{ms}$ ) with densities  $\rho_{fs}$  and  $\rho_{ms}$ , respectively.

When filler-matrix solution was spun in electrospinning, the solvent evaporated and solid composite fibers of filler and matrix were obtained. The volume fraction of filler ( $VF_f = \varphi$ ) in dried solid CNBs was calculated as;

$$\varphi = VF_f = \frac{xV_{fs}}{xV_{fs} + yV_{ms}} \quad (S12)$$

The density of solid CNBs ( $\rho_c$ ) was determined by rule of mixture;

$$\rho_c = \frac{1}{\left( \frac{xV_{fs} \cdot \rho_{fs}}{xV_{fs} \cdot \rho_{fs} + yV_{ms} \cdot \rho_{ms}} \right) \cdot \frac{1}{\rho_f} + \left( \frac{yV_{ms} \cdot \rho_{ms}}{xV_{fs} \cdot \rho_{fs} + yV_{ms} \cdot \rho_{ms}} \right) \cdot \frac{1}{\rho_m}} \quad (S13)$$

To simplify the **Equation S13**;

$$WF_f = \frac{xV_{fs} \cdot \rho_{fs}}{xV_{fs} \cdot \rho_{fs} + yV_{ms} \cdot \rho_{ms}} \quad (S14)$$

$$WF_m = \frac{yV_{ms} \cdot \rho_{ms}}{xV_{fs} \cdot \rho_{fs} + yV_{ms} \cdot \rho_{ms}} \quad (S15)$$

where;  $WF_f$  and  $WF_m$  are the weight fractions of filler and matrix, respectively and a simplified form of **Equation S13** is;

$$\rho_c = \frac{1}{\frac{WF_f}{\rho_f} + \frac{WF_m}{\rho_m}} \quad (S16)$$



### S11. Identifying electrical conductivity of electrospun fibers

The highly aligned fibers were collected on microscopic glass slides (GS) (**Figure S1f**) for the measurement of resistance  $R$  using an ohmmeter (Keithley 2400) (**Figure S1g** and **S1h**). All samples of conductive fibers (CNBs) were annealed isothermally in a vacuum oven (**Figure S1i**), at their respective temperatures for 24 hours and subsequently quenched to room temperature. Two opposite sides of the GS, were coated with silver-ink to ensure metallic contact with the measuring electrodes.

An equation is derived to calculate the conductivity  $\sigma$  of CNBs. First consider a single fiber of length  $L$  and radius  $r$ , which has cross-sectional area  $A_e = \pi r^2$  (as shown in schematic **Figure S1j**). The fiber has uniform radius along its whole length.

At constant temperature, the resistance of a single fiber  $R_e$ ;

$$R_e = \frac{\mu_e \cdot L}{\pi r^2} \quad (\text{S17})$$

where;  $\mu_e$  is resistivity of a single fiber. For  $n$  fibers on GS follows;

$$R = \frac{\mu \cdot L}{n\pi r^2} \quad (\text{S18})$$

where;  $R$  and  $\mu$  are total resistance and resistivity of  $n$  fibers, respectively.

As volume of  $n$  cylindrical fibers on GS;  $V = n\pi r^2 L$

$$n\pi r^2 L = \frac{W_c}{\rho_c} \quad (\text{S19})$$

where;  $W_c$  and  $\rho_c$  are the final weight and density of dried CNBs.

Combining and re-arranging **Equations S18** and **19**;

$$R = \frac{\mu \cdot L^2 \cdot \rho_c}{W_c} \quad (\text{S20})$$

Since conductivity  $\sigma$  is the reciprocal of the resistivity  $\mu$ ;

$$\sigma = \frac{1}{\mu} = \frac{L^2 \cdot \rho_c}{R \cdot W_c} \quad (\text{S21})$$

Using **Equation S21**, the electrical conductivity  $\sigma$  of CNBs can be calculated using the value of  $R$ , which was measured using a two-point probe method for a constant voltage ( $IV$ ) at room

temperature,  $W_c$  that was measured before applying the silver-ink paste,  $L$  for all fibers that is equal to the length of a single fiber and  $\rho_c$  (density of dried CNBs) that was calculated from **Equation S16**.

### **S12. Annealing process for conductive fibers**

All samples of oriented electrospun conductive nanofibrous biocomposites (CNBs) were annealed isothermally in a vacuum oven at temperatures of 25, 40, 60, 100, 130, 160, 170 and 180°C with time intervals of 30, 60, 90, 120, 360, 720, 1080 and 1440 min, respectively. All CNBs samples were collected on glass slides. First, the vacuum oven was turned on and heated up to the required temperature and after reaching stable heating conditions, the samples were put into the airtight oven and the vacuum turned on to avoid degradation due to air during heating. After each annealing temperature and time, the sample was taken out of the oven to allow cooling to room temperature.

### **S13. Experimental procedure for complex viscosity measurement using rheometer**

Pure PLA pellets were pre-heated in a vacuum oven at 35°C for 4 h to remove residual moisture content. The dried PLA pellets were pressed into round geometry (25 mm diameter and 2 mm height) using a hot press at 190 °C at 10 bar pressure. To achieve bubble free samples (round plates) and exclude degradation of the material, the whole pressing process was performed under vacuum. Shear experiments were carried out with the DHR 3 rheometer from TA Instruments (USA) with a plate-plate geometry (25 mm diameter, 1800  $\mu\text{m}$  gap). To prevent polymer degradation, a nitrogen atmosphere was applied during the experiments. Frequency sweeps were performed at four temperatures (150°C, 160°C, 170°C and 180°C) in a range of 0.1 – 628  $\text{rad s}^{-1}$ . Previously, oscillating shear experiments were performed to test the linear viscoelastic regime (amplitude sweeps). On varying the amplitude from 0.001 to 100%, the optimal choice was revealed at 3%.

#### S14. DSC calculations and crystallinity measurements

The crystallinity of the oriented electrospun conductive nanofibrous biocomposites (CNBs) of PLA-PANi:CSA was determined using a differential scanning calorimeter (DSC) (Model DSC Q 2000, TA Instruments). The recommended amount (5-10 mg) of sample material was sealed in aluminium pans, and the scans were acquired between 20-200 °C at a scan rate of 10 °C /min in dry nitrogen atmosphere. DSC thermograms of pure un-processed PLA pellets, thermograms of electrospun fibers of pure PLA and thermograms of annealed PLA-PANi:CSA fibers with 10% filler concentration ( $\phi = 10\%$ ) are shown in **Figure S8**.

The absolute degree of crystallinity ( $\chi_c$ ) can be calculated with **Equation S22** <sup>6</sup>;

$$\chi_c(\%) = \frac{\Delta H_f}{\Delta H_f^0} \cdot 100 \quad (\text{S22})$$

Where;  $\Delta H_f$ , and  $\Delta H_f^0$  are the apparent heat of fusion per gram of the sample and the thermodynamic heat of fusion per gram of 100% crystalline polymer, respectively. The value of  $\Delta H_f^0$  for PLA is 93 J/g <sup>6</sup>.

To determine the crystallinity of the electrospun fibers, the extra heat released during heating (i.e., enthalpy of cold crystallization;  $\Delta H_c$ ) was subtracted from the total endothermic heat flow during melting of all crystallites. Thus, **Equation S23** <sup>6</sup> gives;

$$\chi_c(\%) = \frac{\Delta H_f - \Delta H_c}{\Delta H_f^0} \cdot 100 \quad (\text{S23})$$

The melting temperature ( $T_m$ ),  $\Delta H_f$ , and  $\Delta H_c$  were determined from DSC thermograms.

Parameters  $T_m$  and  $\Delta H_f$  were taken as the peak temperature and the area of the melting endotherm, respectively. The DSC thermograms (**Figure S8**) and table (**Table S5**) depict the thermodynamic characteristics of glass transition temperature ( $T_g$ ), crystallization temperature ( $T_c$ ),  $T_m$ ,  $\Delta H_c$ ,  $\Delta H_f^0$ ,  $\Delta H_f$  and  $\chi_c$  for all samples.

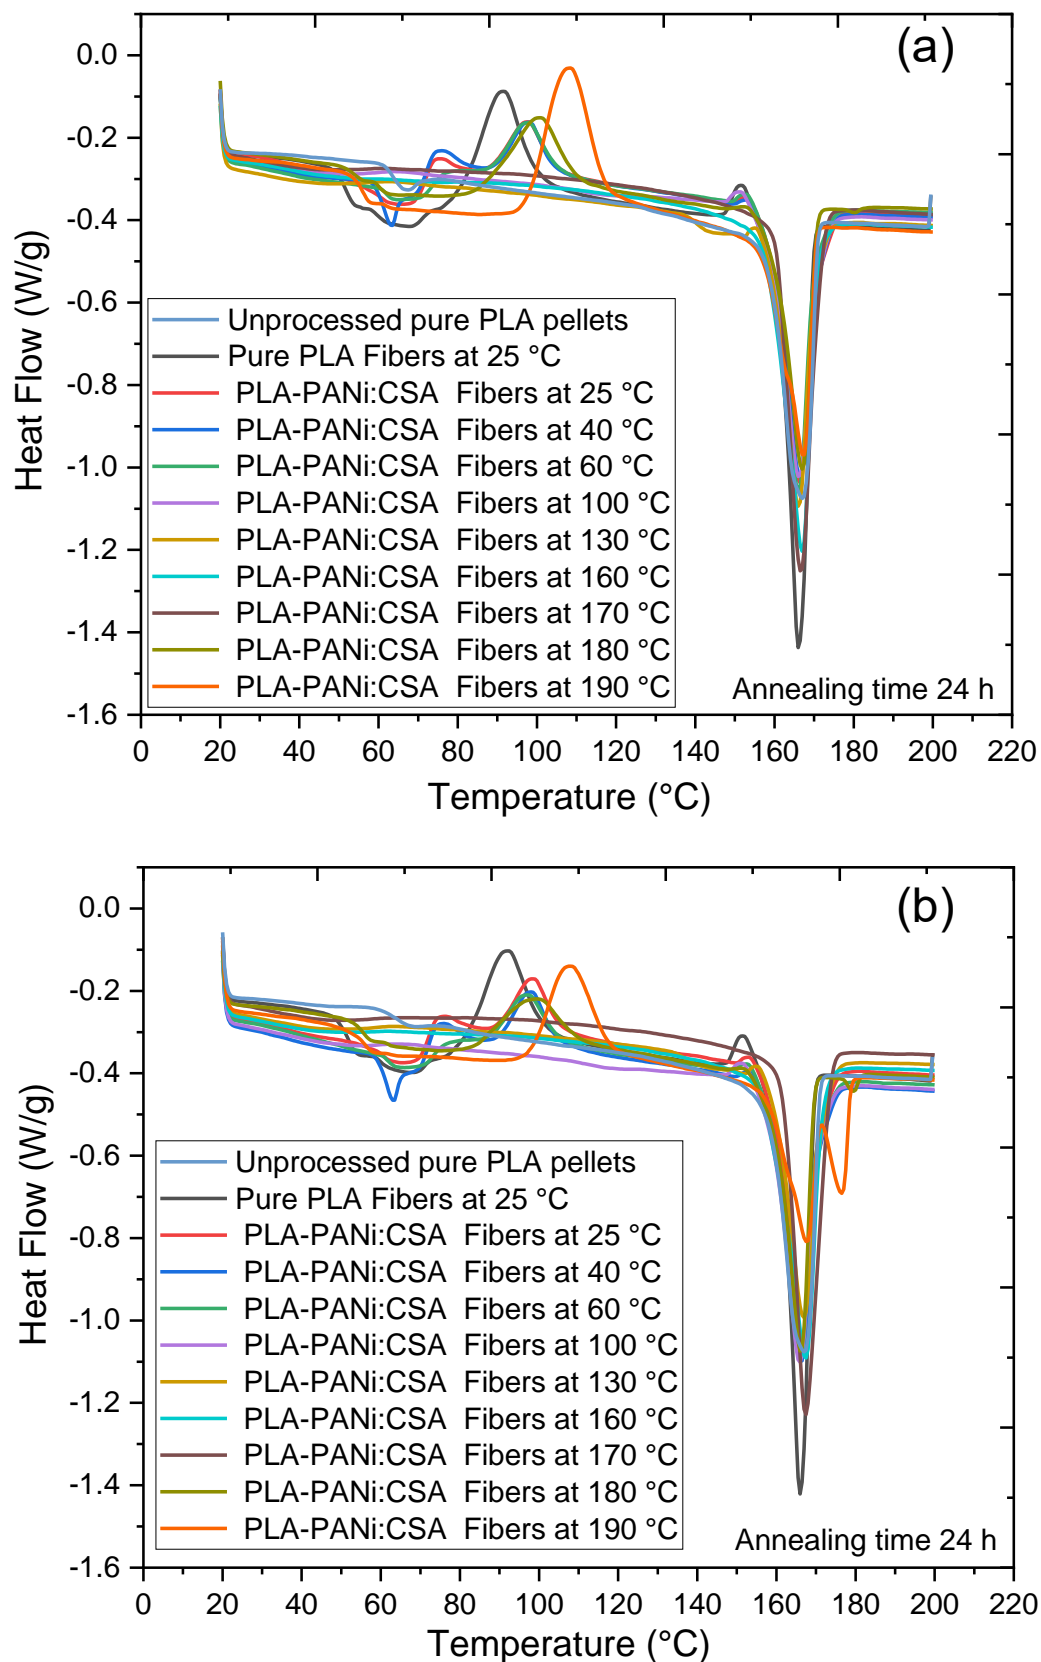

**Figure S8.** DSC thermograms for pure PLA pellets (un-processed), pure PLA fibers and annealed PLA-PANi:CSA fibers with  $\phi_{PANi} \approx 10\%$ . Panels a and b show first and second time measurements, as replicates of the same material compositions, respectively.

**Table S5.** DSC data after first heating cycle with replicates of the same material compositions. The value of  $\Delta H_f^\circ$  for PLA (93 J/g) was taken from the literature <sup>6</sup>.

| Samples with their annealing temperatures | T <sub>g</sub><br>(°C) | T <sub>c</sub><br>(°C) | T <sub>m</sub><br>(°C) | ΔH <sub>c</sub><br>(J/g) | ΔH <sub>f</sub> <sup>°</sup><br>(J/g) | ΔH <sub>f</sub><br>(J/g) | χ <sub>c</sub><br>(%) |
|-------------------------------------------|------------------------|------------------------|------------------------|--------------------------|---------------------------------------|--------------------------|-----------------------|
| 1-Pure PLA pellets                        | 62                     | -                      | 167                    | 25.71                    | 35.13                                 | 93                       | 37.7                  |
| 2-Pure PLA pellets                        | 61.8                   | -                      | 167                    | 22.74                    | 36.67                                 | 93                       | 39.4                  |
| 1-Pure PLA fibers                         | 49.5                   | 91.1                   | 166                    | 7.13                     | 48.4                                  | 93                       | 24.4                  |
| 2-Pure PLA fibers                         | 49.1                   | 91.7                   | 166                    | 6.58                     | 43.5                                  | 93                       | 22.3                  |
| 1-PLA-PANi:CSA fibers (25 °C)             | 65.1                   | 97.8                   | 166.4                  | 5.64                     | 27.12                                 | 93                       | 21.5                  |
| 2-PLA-PANi:CSA fibers (25 °C)             | 58.1                   | 98.6                   | 166.3                  | 6.37                     | 23.98                                 | 93                       | 18.7                  |
| 1-PLA-PANi:CSA fibers (40 °C)             | 59.3                   | 98.1                   | 166.4                  | 3.24                     | 27.12                                 | 93                       | 23.1                  |
| 2-PLA-PANi:CSA fibers (40 °C)             | 59.5                   | 98.1                   | 166.2                  | 4.45                     | 27.14                                 | 93                       | 22.3                  |
| 1-PLA-PANi:CSA fibers (60 °C)             | 60.9                   | 98.1                   | 166                    | 25.71                    | 29.45                                 | 93                       | 28.2                  |
| 2-PLA-PANi:CSA fibers (60 °C)             | 60.9                   | 97.2                   | 166.1                  | 22.74                    | 26.78                                 | 93                       | 24.0                  |
| 1-PLA-PANi:CSA fibers (100 °C)            | -                      | -                      | 166.1                  | -                        | 28.72                                 | 93                       | 30.9                  |
| 2-PLA-PANi:CSA fibers (100 °C)            | -                      | -                      | 165.7                  | -                        | 31.13                                 | 93                       | 33.5                  |
| 1-PLA-PANi:CSA fibers (130 °C)            | -                      | -                      | 166                    | -                        | 37.12                                 | 93                       | 39.9                  |
| 2-PLA-PANi:CSA fibers (130 °C)            | -                      | -                      | 166.8                  | -                        | 32.65                                 | 93                       | 35.1                  |
| 1-PLA-PANi:CSA fibers (160 °C)            | -                      | -                      | 166.9                  | -                        | 38.53                                 | 93                       | 41.4                  |
| 2-PLA-PANi:CSA fibers (160 °C)            | -                      | -                      | 167.4                  | -                        | 36.81                                 | 93                       | 39.6                  |
| 1-PLA-PANi:CSA fibers (170 °C)            | -                      | -                      | 166.7                  | -                        | 37.76                                 | 93                       | 40.6                  |
| 2-PLA-PANi:CSA fibers (170 °C)            | -                      | -                      | 166.3                  | -                        | 37.95                                 | 93                       | 40.8                  |
| 1-PLA-PANi:CSA fibers (180 °C)            | 58.1                   | 99.6                   | 167                    | 11.18                    | 27.01                                 | 93                       | 17.0                  |
| 2-PLA-PANi:CSA fibers (180 °C)            | 53.9                   | 98.6                   | 166.1                  | 10.61                    | 27.65                                 | 93                       | 18.3                  |
| 1-PLA-PANi:CSA fibers (190 °C)            | 54.2                   | 107.5                  | 167.2                  | 23.43                    | 28.69                                 | 93                       | 5.66                  |
| 2-PLA-PANi:CSA fibers (190 °C)            | 53.7                   | 107.4                  | 167.6                  | 17.15                    | 24.26                                 | 93                       | 7.65                  |

### S15. Identifying elasticity of electrospun fibers

The single fiber tensile test is performed to determine the mechanical properties of CNBs.

The schematic of the mechanical testing process and photo of the Single-fiber tensile testing machine (Vibrodyn 400, Lenzing instruments GmbH & Co. KG, Germany) are shown in

**Figure S1k-o.** Figures S1p and S1q show a fiber bundle on the SEM holder and SEM image

of a fiber bundle, respectively. Under the conditions of 200 mg load and 10 mm clamping length within the VPN program, the fiber bundle is stretched at a speed of 10 mm/min until it breaks, providing its force-strain curve. Three replicates are investigated for each kind of fiber. Before the tensile testing, the tensile positions are marked on each fiber bundle. After testing, the fiber bundle is cut off along the marks. The weight of each fiber bundle (within the marked length) is measured.

An equation is derived to calculate the elastic Young's modulus ( $E$ ) of CNBs. The highly aligned fibers are collected on the glass slide (GS) and rolled into a bundle of parallel fibers. Considering a bundle of  $n$  fibers with length  $L$  and radius  $r$ , which has cross-sectional area  $A = n\pi r^2$ , under optimal conditions, the Young's modulus of a fiber,  $E$ ;

$$E = \frac{\sigma}{\varepsilon} \quad (\text{S24a})$$

$$\sigma = \frac{F}{A} \quad (\text{S24b})$$

$$\varepsilon = \frac{\Delta L}{L} \quad (\text{S24c})$$

where;  $\sigma$ ,  $\varepsilon$ ,  $F$ ,  $A$ ,  $\Delta L$  and  $L$  are stress, strain, force, cross-sectional area, change in length and length of sample, respectively.

As volume of a bundle of fibers;  $V = n\pi r^2 L$

$$V = \frac{W_c}{\rho_c} \quad (\text{S25a})$$

$$V = A \cdot L \quad (\text{S25b})$$

where;  $W_c$  and  $\rho_c$  are the final weight (within the red marks) and density (as calculated using Equation S16) of bundle fiber, respectively.

Combining and re-arranging **Equations S24a, S24b, S24c, S25a and S25b**;

$$E = \frac{F \cdot L}{\Delta L} \cdot \frac{\rho_c \cdot L}{W_c} \quad (\text{S26a})$$

$$E = k \cdot \frac{\rho_c \cdot L}{W_c} \quad (\text{S26b})$$

where;  $k = \frac{F \cdot L}{\Delta L}$  is the slope of the force-strain curve in the linear elastic region.

The Young's modulus ( $E$ ) of a bundle of fibers can be determined using **Equation S26**.

## References

- (1) Schubert, D. W. Revealing Novel Power Laws and Quantization in Electrospinning Considering Jet Splitting—Toward Predicting Fiber Diameter and Its Distribution. *Macromol. Theory Simul.* **2019**, 28 (4), 1900006. DOI: 10.1002/mats.201900006.
- (2) Schubert, D. W.; Allen, V.; Dippel, U. Revealing Novel Power Laws and Quantization in Electrospinning Considering Jet Splitting—Toward Predicting Fiber Diameter and Its Distribution Part II Experimental. *Advanced Engineering Materials* **2021**. DOI: 10.1002/adem.202001161.
- (3) Munawar, M. A.; Schubert, D. W. Modeling and optimization of diameter of highly oriented electrospun nanofibers of biopolymer.
- (4) *DIN 51562-1:1999-01, Viskosimetrie - Messung der kinematischen Viskosität mit dem Ubbelohde-Viskosimeter - Teil\_1: Bauform und Durchführung der Messung*; Beuth Verlag GmbH, Berlin.
- (5) Tam, D.; Ruan, S.; Gao, P.; Yu, T. 10 - High-performance ballistic protection using polymer nanocomposites. In *Advances in Military Textiles and Personal Equipment : Woodhead Publishing Series in Textiles*; Sparks, E., Ed.; Woodhead Publishing, 2012; pp 213–237. DOI: 10.1533/9780857095572.2.213.
- (6) Srithep, Y.; Nealey, P.; Turng, L.-S. Effects of annealing time and temperature on the crystallinity and heat resistance behavior of injection-molded poly(lactic acid). *Polym Eng Sci* **2013**, 53 (3), 580–588. DOI: 10.1002/pen.23304.
